# Supplementary material for: Genome-Wide Identification of Cellulose-Like Synthase D Gene Family in Dendrobium Catenatum
Source: Research Square preprint supplement (doi:10.21203/rs.3.rs-131283/v1), 2021-01-13
Supplement: Supplementary file 1 [file 64d950dc39ff956ad90f4b90.xlsx]

## Sheet: Sheet1
Additional file 1 Transcriptome data of drought treatment.
Gene ID	Gene name	FPKM.DR5	FPKM.DR6	FPKM.DR7	FPKM.DR8	FPKM.DR10	FPKM.DR11	FPKM.DR15
LOC110112325	DcCslD1	1.53077	0.727989	0.569647	0.172911	0.169073	1.30242	0.197537
LOC110097221	DcCslD2a	2.00198	0.274511	0.288906	0.625088	2.28679	0.671222	0.045501
LOC110101672	DcCslD2b	1.77695	0.799814	0.413553	0.233345	0.54174	0.528809	0.44233
LOC110116295	DcCslD3a	1.31638	0.813745	0.173065	0.267406	0.347554	0.771304	0.801763
LOC110109313	DcCslD3b	0.126764	0.338956	0.274089	0.259447	0.540556	0.693627	0.614127
LOC110115924	DcCslD4a	0.869479	0.395606	0.370548	0.139032	0.320366	0.872518	0.16975
LOC110109154	DcCslD4b	0.020522	0.292867	0	0.057221	0	0.226724	0.095716
LOC110104407	DcCslD5	5.46456	2.77959	7.70224	3.44135	2.89136	4.0199	2.77565
