# Supplementary material for: Genome-Wide Identification of Cellulose-Like Synthase D Gene Family in Dendrobium Catenatum
Source: Research Square preprint supplement (doi:10.21203/rs.3.rs-131283/v1), 2021-01-13
Supplement: Supplementary file 2 [file 8a8dfc58f491a546f3366bb2.xlsx]

## Sheet: Sheet1
Additional file 4 Accession numbers for each of the gene sequences referred to in this work.
Gene name	Gene ID
DcCslD1	LOC110112325
DcCslD2a	LOC110097221
DcCslD2b	LOC110101672
DcCslD3a	LOC110116295
DcCslD3b	LOC110109313
DcCslD4a	LOC110115924
DcCslD4b	LOC110109154
DcCslD5	LOC110104407
AtCslD1	AT2G33100.1
AtCslD2	AT5G16910.1
AtCslD3	AT3G03050.1
AtCslD4	AT4G38190.1
AtCslD5	AT1G02730
AtCslD6	AT1G32180.1
OsCslD1	AC027037.6
OsCslD3	AC091687.1
OsCslD4	AK242601.1
OsCslD5	Os06g0336500
ZmCslD1	GRMZM2G015886
ZmCslD2	GRMZM2G052149
ZmCslD3	GRMZM2G061764
ZmCslD4	GRMZM2G044269
ZmCslD5	GRMZM2G436299
PtrCslD1	Potri.002G200300
PtrCslD2	Potri.014G125100
PtrCslD3	Potri.003G097100
PtrCslD4	Potri.001G136200
PtrCslD5	Potri.019G046700
PtrCslD6	Potri.013G082200
PtrCslD7	Potri.004G208800
PtrCslD8	Potri.009G170000
PtrCslD9	Potri.003G177800
PtrCslD10	Potri.001G050200
-	PAXXG023130
-	PAXXG228240
-	PAXXG000590
-	PAXXG120890
-	PAXXG156700
-	PAXXG228570
-	PAXXG188550
-	PAXXG254610
