# Supplementary material for: Genome-Wide Identification of Cellulose-Like Synthase D Gene Family in Dendrobium Catenatum
Source: Research Square preprint supplement (doi:10.21203/rs.3.rs-131283/v1), 2021-01-13
Supplement: Supplementary file 3 [file dfe8d925c71e2ddda1190d3e.xlsx]

## Sheet: Sheet1
Additional file 2 Transcriptome data of low-temperature treatment.
Gene ID	Transcript ID	Gene name	FPKM.Cold1	FPKM.Cold2	FPKM.Cold3	FPKM.Control1	FPKM.Control2	FPKM.Control3
LOC110112325	XM_020844545.1	DcCslD1	2.84416	2.35213	4.32073	0.665499	0.721148	0.505475
LOC110097221	XM_020823483.1	DcCslD2a	1.58622	2.52419	4.30964	0.606919	0.734828	0.621767
LOC110101672	XM_020829667.1	DcCslD2b	0.816288	1.17434	2.17548	1.98287	1.34942	1.35511
LOC110116295	XM_020849821.1	DcCslD3a	2.8031	3.02891	5.28334	1.18424	2.24743	2.01805
LOC110109313	XM_020840324.1	DcCslD3b	0.256836	0.148557	0.208464	0.152111	0.100892	0.035588
LOC110115924	XM_020849337.1	DcCslD4a	0.548715	0.642419	0.921792	0.573279	0.259171	0.355116
LOC110109154	XM_020840092.1	DcCslD4b	0.583685	0.691687	0.816728	0.52274	0.412958	0.610898
LOC110104407	XM_020833495.1	DcCslD5	2.69211	3.27946	3.32382	0.734034	0.580807	0.82171
